# Supplementary material for: MicroRNA-16 inhibits feto-maternal angiogenesis and causes recurrent spontaneous abortion by targeting vascular endothelial growth factor
Source: PubMed Central journal article supplement (PMC5066269; doi:10.1038/srep35536), 2016-10-17
Supplement: srep35536-s1.pdf [file srep35536-s1.pdf]

**MicroRNA-16 inhibits foeto-maternal angiogenesis and causes recurrent  
spontaneous abortion by targeting vascular endothelial growth factor**

Yongsheng Zhu<sup>1,#</sup>, Hong Lu<sup>2,#</sup>, Zhenghao Huo<sup>2,\*</sup>, Zhanbin Ma<sup>2</sup>, Jie Dang<sup>2</sup>, Wei Dang<sup>3</sup>,  
Lin Pan<sup>4</sup>, Jing Chen<sup>2</sup>, Huijun Zhong<sup>2</sup>

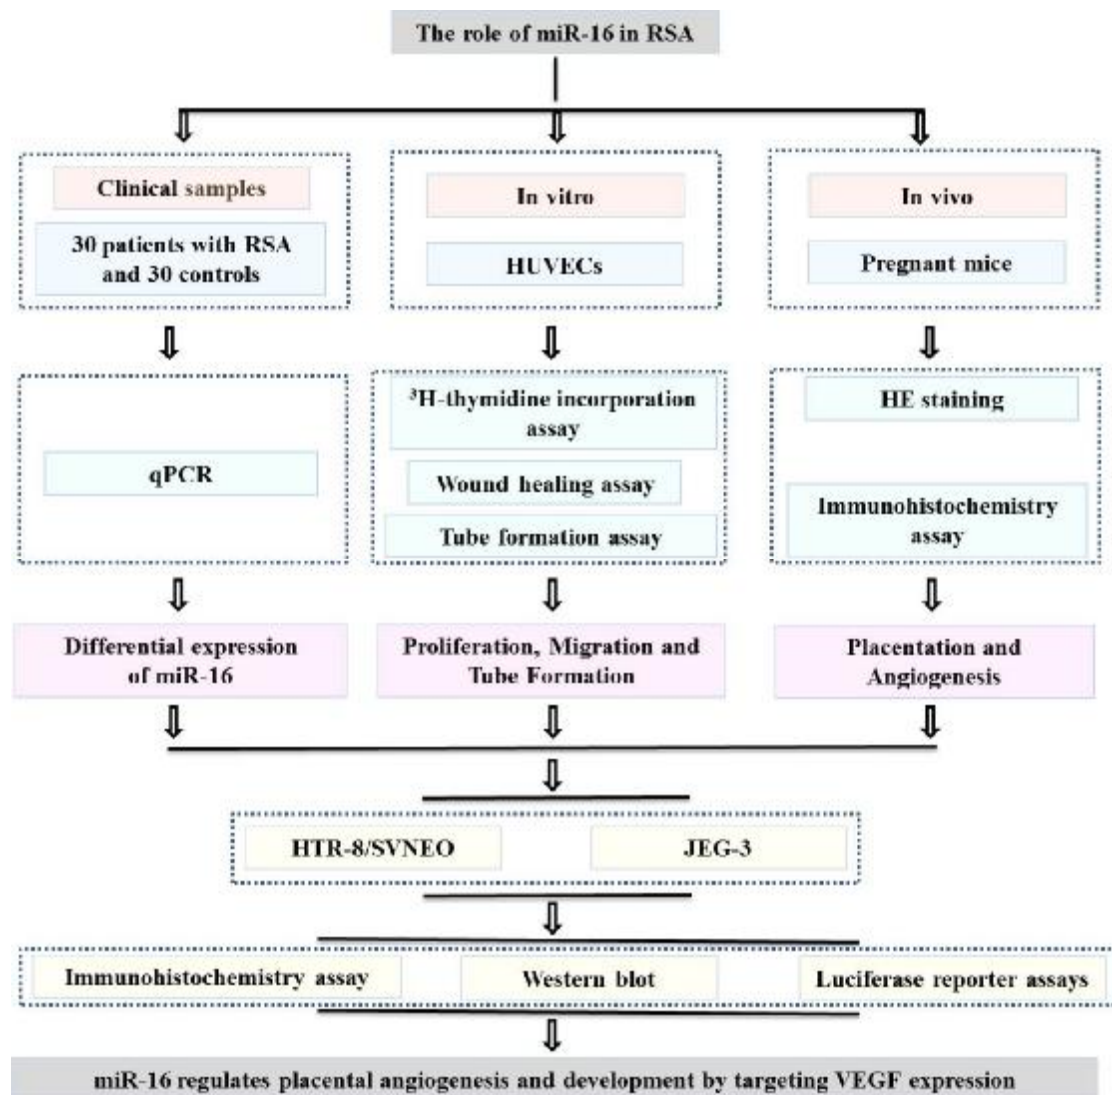

**Supplementary Figure S1** Model illustrating that technical route in this work.
